# Supplementary material
Source: PubMed Central journal article supplement (PMC6322449)

Weinerman et al., Supplemental Table S1. Genes that showed differences in gene expression between optimal and suboptimal embryos. (Note: genes without symbols are not included.)

| Gene symbol       | Fold change* |
|-------------------|--------------|
| <i>Hpse</i>       | -11.67       |
| <i>Slc1a5</i>     | -11.19       |
| <i>Nupr1</i>      | -7.26        |
| <i>Reep6</i>      | -6.46        |
| <i>Parp8</i>      | 6.27         |
| <i>Tbx20</i>      | 5.21         |
| <i>Ddit4</i>      | -4.70        |
| <i>Slc1a5</i>     | -4.65        |
| <i>Pycr1</i>      | -4.30        |
| <i>Rcn1</i>       | -3.91        |
| <i>P2rx3</i>      | -3.68        |
| <i>Acsl5</i>      | -3.41        |
| <i>Shmt2</i>      | -3.38        |
| <i>Trib3</i>      | -3.34        |
| <i>Vegfa</i>      | -3.33        |
| <i>Sox7</i>       | -3.26        |
| <i>St6galnac2</i> | 2.82         |
| <i>Psat1</i>      | -2.58        |
| <i>Pccb</i>       | -2.45        |
| <i>Trmt2b</i>     | -2.39        |
| <i>Cebpb</i>      | -2.30        |
| <i>Slc30a5</i>    | -2.22        |
| <i>Tpm3</i>       | -2.12        |
| <i>Slc3a2</i>     | -2.11        |
| <i>Trp53bp2</i>   | 2.06         |
| <i>Gys1</i>       | -2.00        |
| <i>Tnks</i>       | -1.89        |
| <i>BC016579</i>   | -1.88        |
| <i>Tmsb4x</i>     | -1.80        |
| <i>Pck2</i>       | -1.79        |
| <i>Gars</i>       | -1.76        |
| <i>Ap1m1</i>      | -1.75        |
| <i>Pi4ka</i>      | -1.69        |
| <i>Gng2</i>       | -1.67        |
| <i>Mrpl19</i>     | 1.66         |
| <i>Apobr</i>      | -1.58        |
| <i>Aup1</i>       | -1.57        |
| <i>Dmgdh</i>      | 1.52         |
| <i>Mgat3</i>      | -1.51        |
| <i>Gbas</i>       | -1.49        |
| <i>Ldb1</i>       | 1.40         |
| <i>Atp1a1</i>     | -1.38        |
| <i>Olfir544</i>   | 1.38         |
| <i>Cplx3</i>      | 1.37         |
| <i>Wfdc2</i>      | -1.33        |
| <i>Cntnap5a</i>   | 1.29         |
| <i>Myh2</i>       | 1.25         |
| <i>Cldn5</i>      | 1.2          |
| <i>Arid3c</i>     | 1.20         |
| <i>Tcrb-J</i>     | 1.16         |

\*Fold-change represents suboptimal compared to optimal embryos.

**WEINERMAN ET AL., SUPPLEMENTAL FIGURE LEGENDS**

Supplemental Figure S1. Microarray of gene expression in optimal (n=5) and suboptimal (n=5) blastocysts. **A)** Heat map of 74 genes with differential expression between optimal and suboptimal blastocysts; up-regulated genes are shown in red and down-regulated genes in blue. **B)** Principle component analysis demonstrating clustering of the optimal embryos (red) compared to suboptimal embryos (blue).

Supplemental Figure S2. Trophoblast and inner cell mass cell counts. **A)** Confocal images of optimal and suboptimal blastocysts stained for trophectoderm (CDX2) and DNA (TO-PRO-3). **B)** Cell numbers did not differ between optimal (n=5) and suboptimal (n=5) embryos. Data are expressed as mean  $\pm$  SEM.

A)

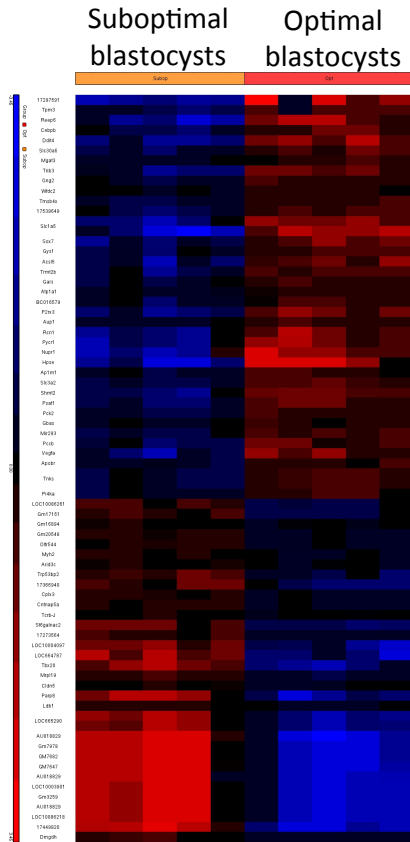

B)

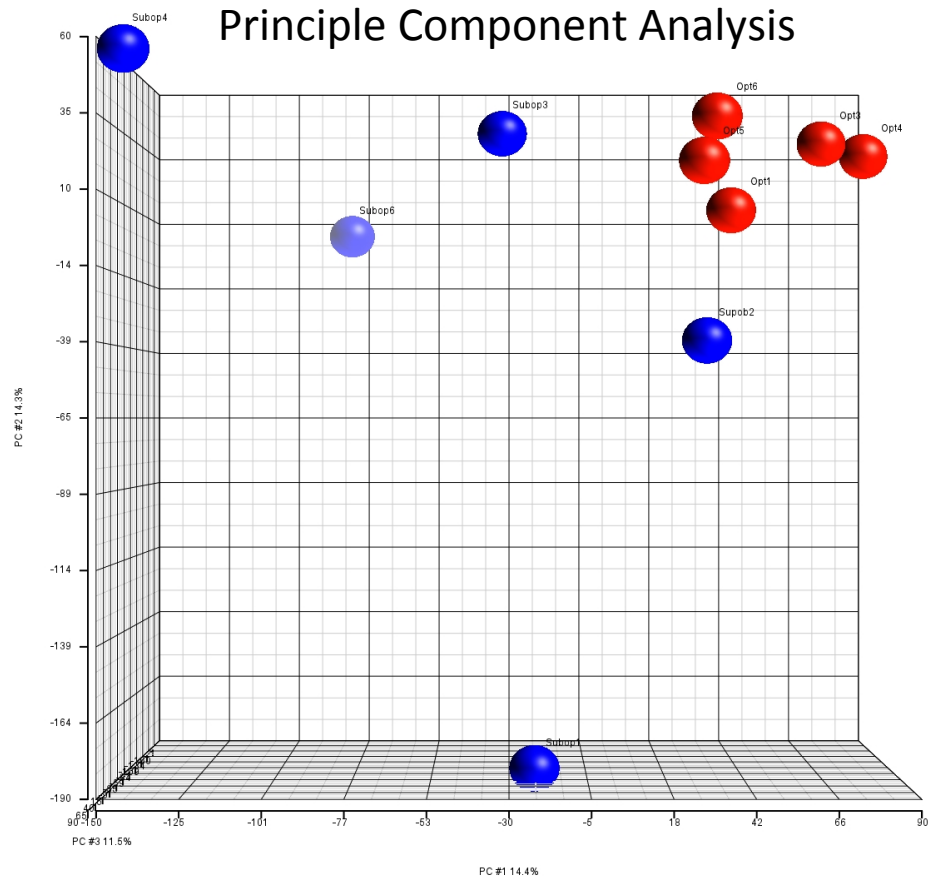

Supplemental Figure S1

A)

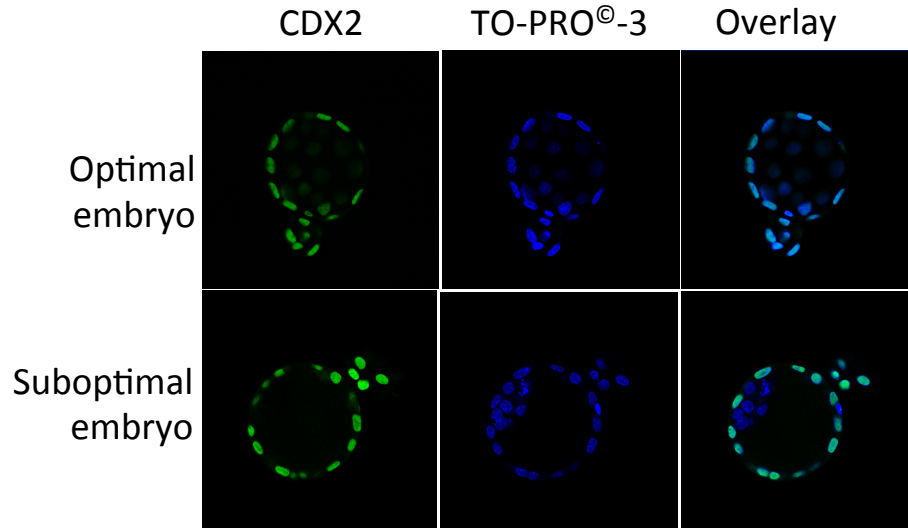

Supplemental Figure S2

B)

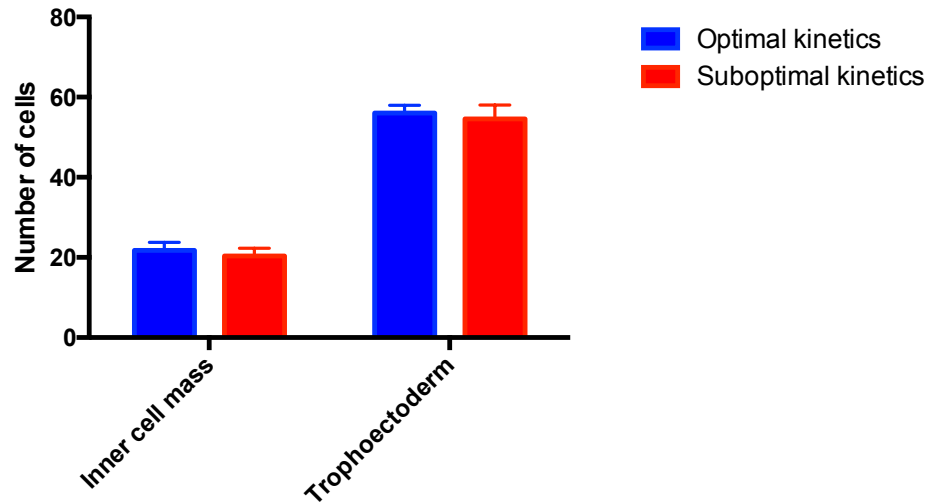

Supplement: biolreprod.115.134080-1.pdf [file biolreprod.115.134080-1.pdf]
